# Supplementary material for: Geographically structured genomic diversity of non-human primate-infecting Treponema pallidum subsp. pertenue
Source: PubMed Central journal article supplement — Microb Genom. 2020 Oct 30;6(11):mgen000463. doi: 10.1099/mgen.0.000463 (PMC7725339; doi:10.1099/mgen.0.000463), 2020-10-30
Supplement: mgen-6-463-s002.pdf [file mgen-6-463-s002.pdf]

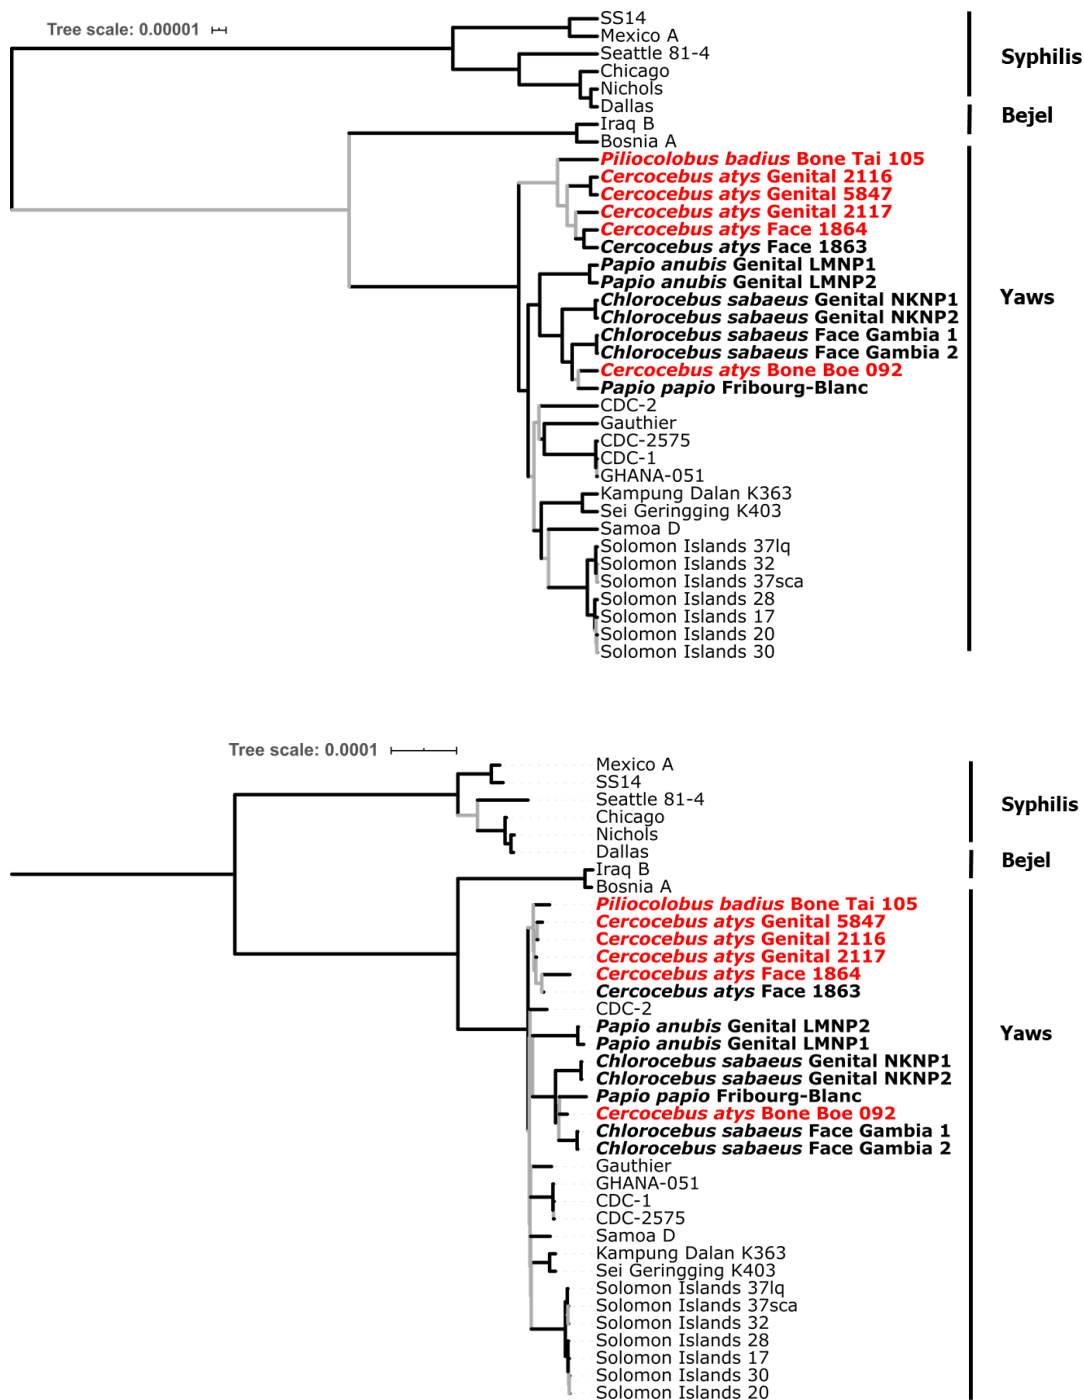

**Fig. S1. Maximum clade credibility (top: relaxed clock model assuming a birth-death process) and maximum likelihood (bottom) trees at 5X coverage and 95% threshold. All simian infecting strains are shown in bold with tip labels showing the species sampled, location of the lesion biopsied or swabbed and sample ID. Genomes generated in this study are shown in red. Branches supported by SH-like aLRT values < 0.90 in the maximum likelihood tree and posterior probabilities < 0.95 in the maximum clade credibility tree are indicated in gray. The scale shows nucleotide substitutions per site.**

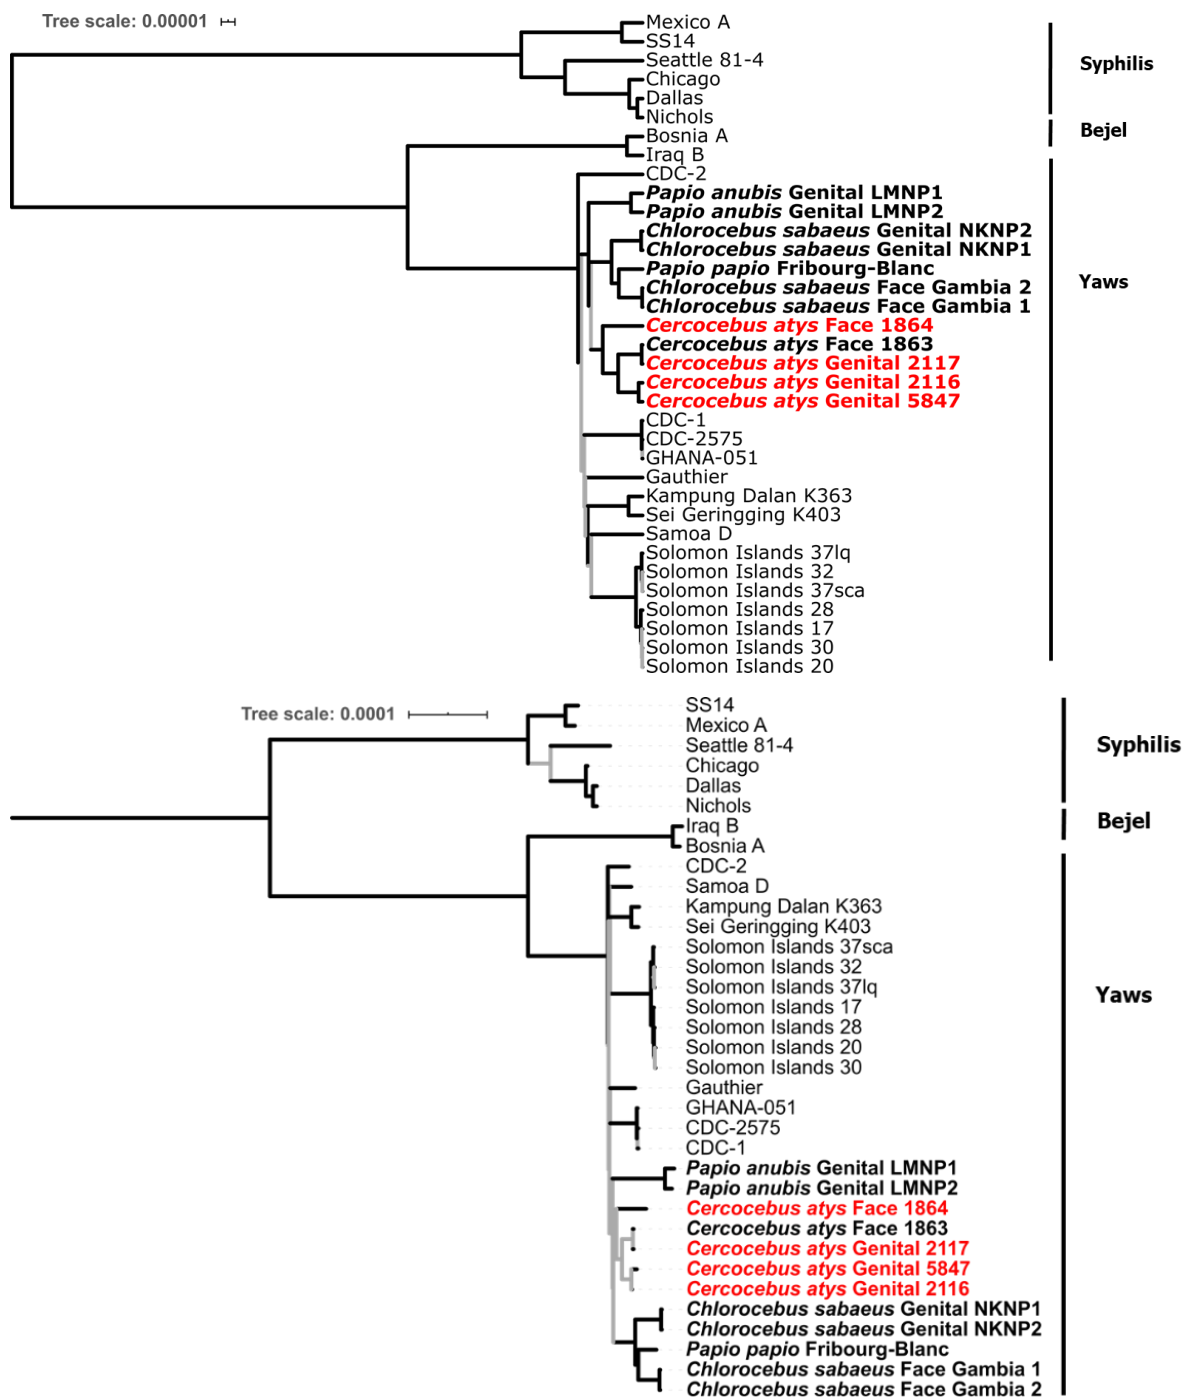

**Fig. S2. Maximum clade credibility (top: relaxed clock model assuming a birth-death process) and maximum likelihood (bottom) trees at 10X coverage and 95% threshold.** All simian infecting strains are shown in bold with tip labels showing the species sampled, location of the lesion biopsied or swabbed and sample ID. Genomes generated in this study are shown in red. Branches supported by SH-like aLRT values < 0.90 in the maximum likelihood tree and posterior probabilities < 0.95 in the maximum clade credibility tree indicated in gray. The scale shows nucleotide substitutions per site.

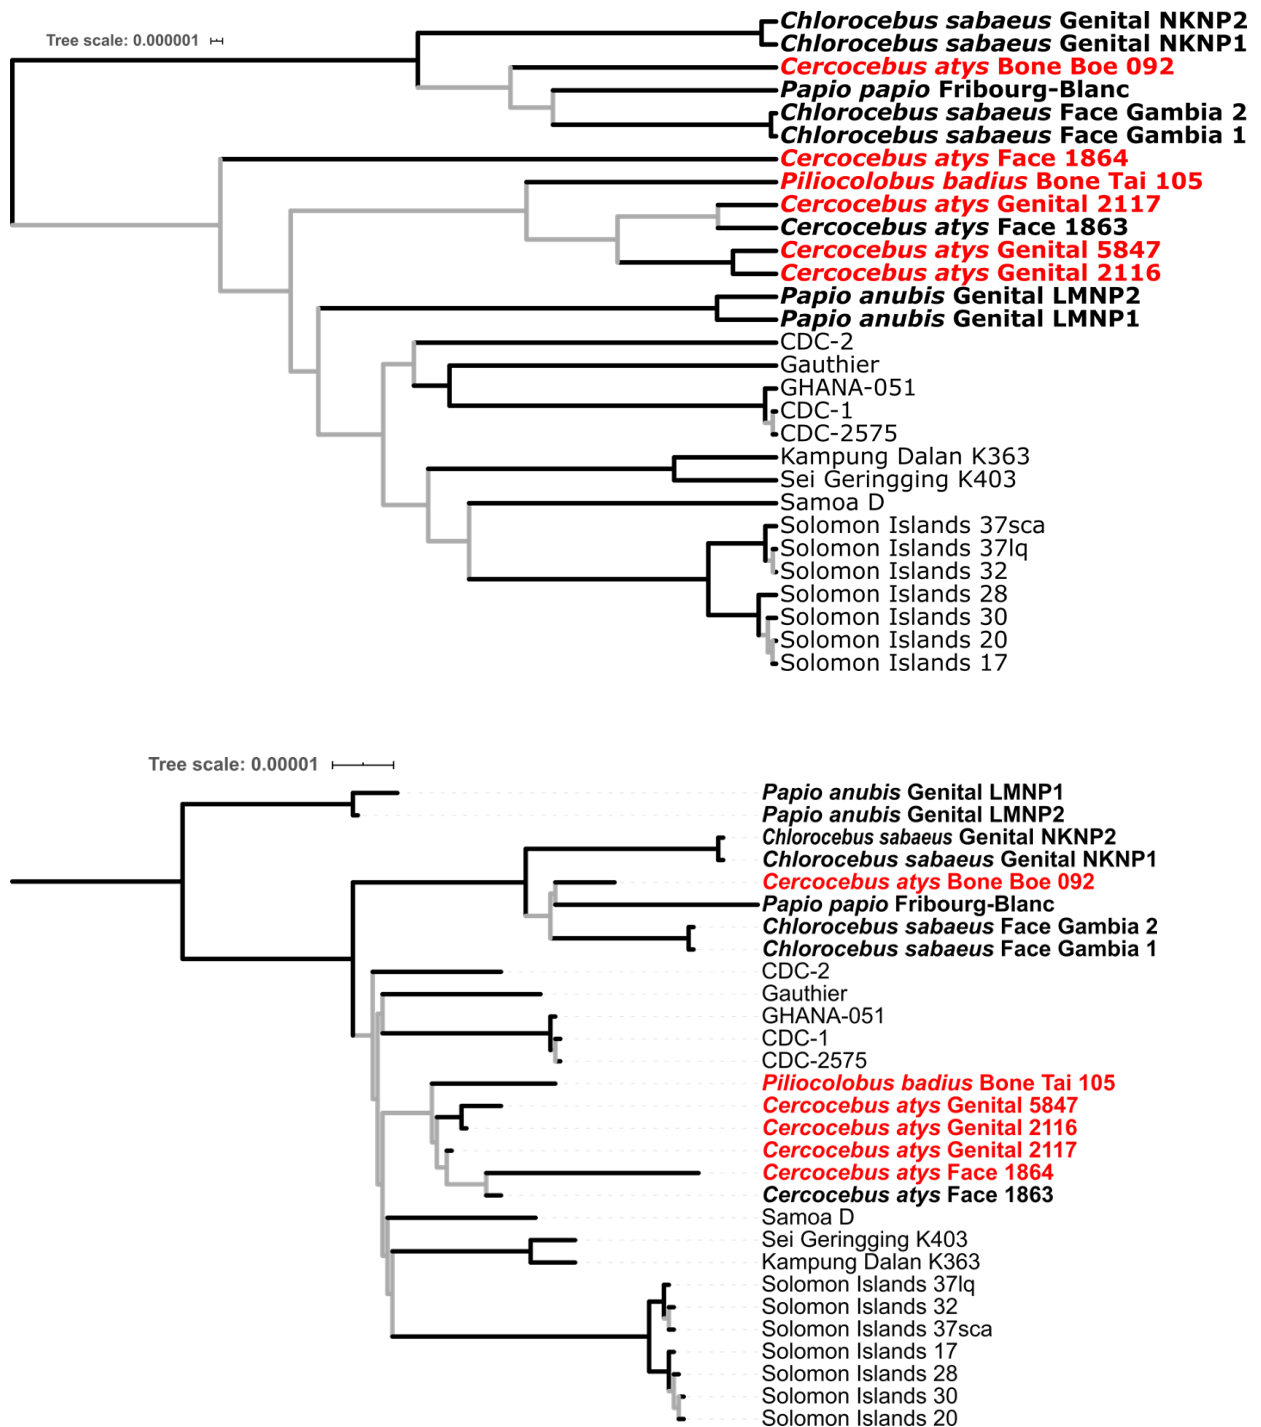

**Fig. S3. Maximum clade credibility (top: relaxed clock model assuming a birth-death process) and maximum likelihood (bottom) trees from ingroup analysis of TPE strains at 5X coverage and 95% threshold.** All simian infecting strains are shown in bold with tip labels showing the species sampled, location of the lesion biopsied or swabbed and sample ID. Genomes generated in this study are shown in red. Branches supported by SH-like aLRT values < 0.90 in the maximum likelihood tree and posterior probabilities < 0.95 in the maximum clade credibility tree indicated in gray. The scale shows nucleotide substitutions per site.

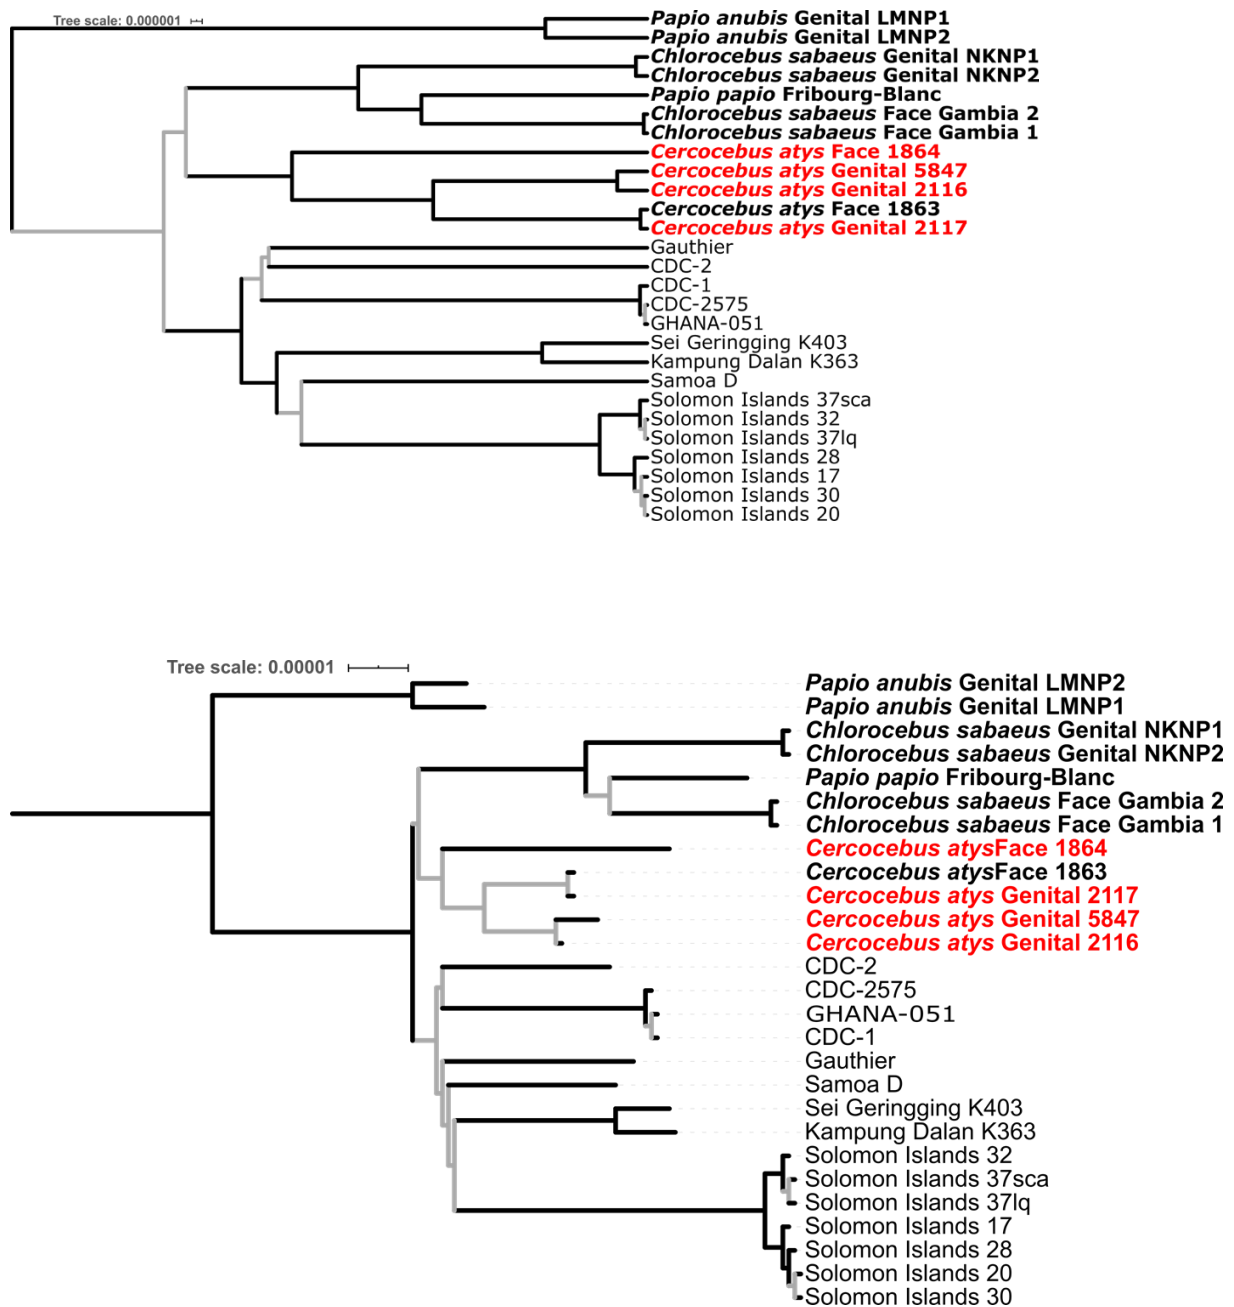

**Fig. S4. Maximum clade credibility (top: relaxed clock model assuming a birth-death process) and maximum likelihood (bottom) trees from ingroup analysis of TPE strains at 10X coverage and 95% threshold.** All simian infecting strains are shown in bold with tip labels showing the species sampled, location of the lesion biopsied or swabbed and sample ID. Genomes generated in this study are shown in red. Branches supported by SH-like aLRT values  $< 0.90$  in the maximum likelihood tree and posterior probabilities  $< 0.95$  in the maximum clade credibility tree indicated in gray. The scale shows nucleotide substitutions per site.

**Table S2: Primers used for the *Treponema pallidum* screening in this study**

| Type of PCR            | Primer pair 5'-3'                                                                             | Product size (bp) | Reference          |
|------------------------|-----------------------------------------------------------------------------------------------|-------------------|--------------------|
| <i>polA</i> PCR        | Forward_AGGATCCGGCATATGTCCAA<br>Reverse_GTGAGCGTCTCATATTCCAAA                                 | 67                | Leslie et al. 2007 |
| Sequencing Hemi_PCR    | M13-Foward_GTAAAACGACGGCCAG                                                                   | 105               |                    |
| Sequencing Hemi_PCR    | M13_Reverse_CAGGAAACAGCTATGAC                                                                 | 105               |                    |
| Fusion PCR             | Fusion_M13_Foward_GTAAAACGACGGCCAGAGGATCCGGCATATGTCCAA                                        | 105               |                    |
| Fusion PCR             | Fusion_M13_Reverse_CAGGAAACAGCTATGACGTGAGCGTCTCATATTCCAAA                                     | 105               |                    |
| <i>cfpA</i> nested PCR | Forward_GAGTCCCAATGTGTTTCATCC<br>Reverse_TAGGATGGCAATCTCCTTCG                                 | 352               | Harper et al. 2012 |
|                        | Forward_GAGCGTCTGGACGTAATGG<br>Reverse_TAGGATGGCAATCTCCTTCG                                   | 189               |                    |
| <i>polA</i> qPCR       | Forward_AGGATCCGGCATATGTCCAA<br>Reverse_GTGAGCGTCTCATATTCCAAA<br>Probe_6FAM-ATGCACCAGCTTC+G+A | 67                | Leslie et al. 2007 |

**Table S3: Published *Treponema pallidum* genomes from humans and NHPs used in this study**

| <b>Isolate ID</b>      | <b>GenBank Accession ID</b> | <b>Host</b>         | <b>TP spectrum</b> | <b>Country</b>        | <b>Reference</b> |
|------------------------|-----------------------------|---------------------|--------------------|-----------------------|------------------|
| Bosnia A               | CP007548.1                  | <i>Homo Sapiens</i> | Bejel              | Bosnia                | 1                |
| Iraq_B                 | CP032303.1                  | <i>Homo Sapiens</i> | Bejel              | Iraq                  | 2                |
| Nichols                | NC_021490.2                 | <i>Homo Sapiens</i> | Syphilis           | USA                   | 3                |
| SS14                   | NC_021508.1                 | <i>Homo Sapiens</i> | Syphilis           | USA                   | 3                |
| Chicago                | NC_017268.1                 | <i>Homo Sapiens</i> | Syphilis           | USA                   | 4                |
| Mexico A               | NC_018722.1                 | <i>Homo Sapiens</i> | Syphilis           | Mexico                | 3                |
| Dallas                 | NC_016844.1                 | <i>Homo Sapiens</i> | Syphilis           | USA                   | 5                |
| Seattle 81-4           | CP003679.1                  | <i>Homo Sapiens</i> | Syphilis           | USA                   | 6                |
| Fribourg-Blanc         | NC_021179.1                 | <i>Papio papio</i>  | Yaws               | Guinea                | 7                |
| Samoa D                | NC_016842.1                 | <i>Homo Sapiens</i> | Yaws               | Samoa                 | 8                |
| Gauthier               | NC_016843.1                 | <i>Homo Sapiens</i> | Yaws               | Republic of the Congo | 8                |
| CDC-1                  | NZ_CP024750.1               | <i>Homo Sapiens</i> | Yaws               | Ghana                 | 9                |
| CDC-2                  | NC_016848.1                 | <i>Homo Sapiens</i> | Yaws               | Ghana                 | 8                |
| CDC_2575               | NZ_CP020366.1               | <i>Homo Sapiens</i> | Yaws               | Ghana                 | 10               |
| Ghana-051              | NZ_CP020365.1               | <i>Homo Sapiens</i> | Yaws               | Ghana                 | 10               |
| Kampung_Dalan_K363     | CP024088.1                  | <i>Homo Sapiens</i> | Yaws               | Indonesia             | 11               |
| Sei_Geringging_K403    | CP024089.1                  | <i>Homo Sapiens</i> | Yaws               | Indonesia             | 11               |
| Solomon Islands 03*    | ERR1470343                  | <i>Homo Sapiens</i> | Yaws               | Solomon Islands       | 12               |
| Solomon Islands 17     | ERR1470344                  | <i>Homo Sapiens</i> | Yaws               | Solomon Islands       | 12               |
| Solomon Islands 20     | ERR1470335                  | <i>Homo Sapiens</i> | Yaws               | Solomon Islands       | 12               |
| Solomon Islands 28     | ERR1470338                  | <i>Homo Sapiens</i> | Yaws               | Solomon Islands       | 12               |
| Solomon Islands 30     | ERR1470334                  | <i>Homo Sapiens</i> | Yaws               | Solomon Islands       | 12               |
| Solomon Islands 32     | ERR1470342                  | <i>Homo Sapiens</i> | Yaws               | Solomon Islands       | 12               |
| Solomon Islands 37 liq | ERR1470330                  | <i>Homo Sapiens</i> | Yaws               | Solomon Islands       | 12               |

|                        |            |                             |      |                 |    |
|------------------------|------------|-----------------------------|------|-----------------|----|
| Solomon Islands 37 sca | ERR1470331 | <i>Homo Sapiens</i>         | Yaws | Solomon Islands | 12 |
| Gambia-1               | SRR4308597 | <i>Chlorocebus sabeus</i>   | Yaws | Gambia          | 13 |
| Gambia-2               | SRR4308605 | <i>Chlorocebus sabaesus</i> | Yaws | Gambia          | 13 |
| Senegal NKNP-1         | SRR4308606 | <i>Chlorocebus sabaesus</i> | Yaws | Senegal         | 13 |
| Senegal NKNP-2         | SRR4308607 | <i>Chlorocebus sabaesus</i> | Yaws | Senegal         | 13 |
| LMNP-1                 | CP021113.1 | <i>Papio anubis</i>         | Yaws | Tanzania        | 13 |
| LMNP-2_BS5             | SRR4308598 | <i>Papio anubis</i>         | Yaws | Tanzania        | 13 |
| LMNP-2_BS6             | SRR4308599 | <i>Papio anubis</i>         | Yaws | Tanzania        | 13 |
| LMNP-2_BS7             | SRR4308601 | <i>Papio anubis</i>         | Yaws | Tanzania        | 13 |
| LMNP-2_BS8             | SRR4308602 | <i>Papio anubis</i>         | Yaws | Tanzania        | 13 |

\*while this genome was initially included, it was subsequently removed from the analyses as very few positions passed our quality filters. When it was included in an initial analysis, it was positioned on a very long branch.

## References

1. Štaudová B, Strouhal M, Zobaníková M, Čejková D, Fulton LL, Chen L, et al. Whole genome sequence of the *Treponema pallidum* subsp. *endemicum* Strain Bosnia A: The genome is related to yaws treponemes but contains few loci similar to syphilis treponemes. *PLoS Neglected Tropical Diseases*. 2014;8(11): e3261. doi:10.1371/journal.pntd.0003261
2. Mikalová L, Strouhal M, Oppelt J, Grange PA, Janier M, Benhaddou N, et al. Human *Treponema pallidum* 11q/j isolate belongs to subsp. *endemicum* but contains two loci with a sequence in TP0548 and TP0488 similar to subsp. *pertenue* and subsp. *pallidum*, respectively. *PLOS Neglected Tropical Diseases*. 2017;11(3): e0005434. doi:10.1371/journal.pntd.0005434
3. Pětrošová H, Pospíšilová P, Strouhal M, Čejková D, Zobaníková M, Mikalová L, et al. Resequencing of *Treponema pallidum* ssp.

*pallidum* strains Nichols and SS14: Correction of sequencing errors resulted in increased separation of syphilis treponeme subclusters.

*PLoS ONE*. 2013;8(9). doi:10.1371/journal.pone.0074319

4. Giacani L, Jeffrey BM, Molini BJ, Le HVT, Lukehart SA, Centurion-Lara A, et al. Complete genome sequence and annotation of the *Treponema pallidum* subsp. *pallidum* Chicago strain. *Journal of Bacteriology*. 2010;192(10): 2645–2646. doi:10.1128/JB.00159-10
5. Zobaníková M, Mikolka P, Čejková D, Pospíšilová P, Chen L, Strouhal M, et al. Complete genome sequence of *Treponema pallidum* strain DAL-1. *Standards in Genomic Sciences*. 2012;7(1): 12–21. doi:10.4056/sigs.2615838
6. Giacani L, Iverson-Cabral SL, King JCK, Molini BJ, Lukehart SA, Centurion-Lara A. Complete genome sequence of the *Treponema pallidum* subsp. *pallidum* Sea81-4 strain. *Genome Announcements*. 2014;2(2). doi:10.1128/genomeA.00333-14
7. Zobaníková M, Strouhal M, Mikalová L, Čejková D, Ambrožová L, Pospíšilová P, et al. Whole genome sequence of the *Treponema* Fribourg-Blanc: Unspecified simian isolate is highly similar to the yaws subspecies. *PLoS Neglected Tropical Diseases*. 2013;7(4): e2172. doi:10.1371/journal.pntd.0002172
8. Čejková D, Zobaníková M, Chen L, Pospíšilová P, Strouhal M, Qin X, et al. Whole genome sequences of three *Treponema pallidum* ssp. *pertenue* strains: Yaws and syphilis treponemes differ in less than 0.2% of the genome sequence. *PLoS Neglected Tropical Diseases*. 2012;6(1). doi:10.1371/journal.pntd.0001471
9. Liska SL, Perine PL, Hunter EF, Crawford JA, Feeley JC. Isolation and transportation of *Treponema pertenue* in golden hamsters. *Current Microbiology*. 1982;7(1): 41–43. doi:10.1007/BF01570978



10. Strouhal M, Mikalová L, Havlíčková P, Tenti P, Čejková D, Rychlík I, et al. Complete genome sequences of two strains of *Treponema pallidum* subsp. *pertenue* from Ghana, Africa: Identical genome sequences in samples isolated more than 7 years apart. *PLOS Neglected Tropical Diseases*. 2017;11(9): e0005894. doi:10.1371/journal.pntd.0005894
11. Strouhal M, Mikalová L, Haviernik J, Knauf S, Bruisten S, Noordhoek GT, et al. Complete genome sequences of two strains of *Treponema pallidum* subsp. *pertenue* from Indonesia: Modular structure of several treponemal genes. *PLOS Neglected Tropical Diseases*. 2018;12(10): e0006867. doi:10.1371/journal.pntd.0006867
12. Marks M, Fookes M, Wagner J, Butcher R, Ghinai R, Sokana O, et al. Diagnostics for yaws eradication: insights from direct next-generation sequencing of cutaneous strains of *Treponema pallidum*. *Clinical infectious diseases*. 2018;66(6): 818–824. doi:10.1093/cid/cix892
13. Knauf S, Gogarten JF, Schuenemann VJ, Nys HM De, Düx A, Strouhal M, et al. Nonhuman primates across sub-Saharan Africa are infected with the yaws bacterium *Treponema pallidum* subsp. *pertenue*. *Emerging microbes & infections*. 2018;7(1): 1–4. doi:10.1038/s41426-018-0156-4

**Table S4: Recombinant and/or paralogous genes removed from the phylogenetic analyses of TPE strains in this study. The gene coordinates used are according to the simian strain Fribourg-Blanc (Refseq: NC\_021179).**

| <b>Gene number</b>  | <b>Gene name</b>                 | <b>Gene coordinates interval</b> | <b>Reference</b> |
|---------------------|----------------------------------|----------------------------------|------------------|
| TP0117              | tprC                             | 134,904 -> 136,700               | 1,2              |
| TP0131              | tprD                             | 152,349 -> 154,139               | 2                |
| TP0133              | hypothetical protein             | 154,340 -> 155,572               | 3                |
| TP0136              | hypothetical protein             | 157,933 -> 159,378               | 4,5              |
| TP0317              | tprG                             | 334,105 -> 336,375               | 1,2              |
| TP0326              | bamA gene                        | 346,037 -> 348,535               | 6–8              |
| TP0462              | V-type ATP synthase subunit A    | 493,089 -> 494,372               | 1                |
| TP0483              | hypothetical protein             | 514,800 -> 516,011               | 1                |
| TP0488              | mcp-2                            | 523,150 -> 525,687               | 6,7,9            |
| TP0548              | hypothetical protein             | 593,973 -> 595,229               | 9                |
| TP0620              | tprI                             | 673,370 -> 675,199               | 2                |
| TP0621              | tprJ                             | 675,258 -> 677,528               | 1,2              |
| TP0856              | lipoprotein                      | 935,859 -> 937,043               | 3                |
| TP0858              | lipoprotein                      | 937,145 -> 938,374               | 3,10             |
| TP0865 (Arora 2016) | UPF0164                          | 946,114 -> 947,559               | 4                |
| TP1031              | tprL                             | 1,126,698 -> 1,128,368           | 7                |
| TP0897              | tprK                             | 977,074 -> 978,654               | 3                |
| TP0433              | acidic repeat protein            | 462,226 -> 464,100               | 3                |
| TP0470              | tetratricopeptide repeat protein | 499,308 -> 500,537               | 3                |
| 16S>23S>5S          | rRNA>rRNA>rrfRNA                 | 231, 197->236,175                | 3                |
| 16S>23S>5S          | rRNA>rRNA>rrfRNA                 | 279, 609->284, 577               | 3                |

**Notes:** spacers between the 16S-23S-5S were also removed from the analysis

## References

1. Grillová L, Oppelt J, Mikalová L, Nováková M, Giacani L, Niesnerová A, et al. Directly Sequenced Genomes of Contemporary Strains of Syphilis Reveal Recombination-Driven Diversity in Genes Encoding Predicted Surface-Exposed Antigens. *Frontiers in Microbiology*. 2019;10 (7): 1691. doi:10.3389/fmicb.2019.01691
2. Gray RR, Mulligan CJ, Molini BJ, Sun ES, Giacani L, Godornes C, et al. Molecular evolution of the tprC, D, I, K, G, and J genes in the pathogenic genus *Treponema*. *Molecular biology and evolution*. 2006;23(11): 2220–2233. doi:10.1093/molbev/msl092
3. Strouhal M, Mikalová L, Haviernik J, Knauf S, Bruisten S, Noordhoek GT, et al. Complete genome sequences of two strains of *Treponema pallidum* subsp. *pertenue* from Indonesia: Modular structure of several treponemal genes. Caimano MJ (ed.) *PLOS Neglected Tropical Diseases*. 2018;12(10): e0006867. doi:10.1371/journal.pntd.0006867
4. Arora N, Schuenemann VJ, Jäger G, Peltzer A, Seitz A, Herbig A, et al. Origin of modern syphilis and emergence of a pandemic *Treponema pallidum* cluster. *Nature Microbiology*. 2016;2(1): 16245. doi:10.1038/nmicrobiol.2016.245
5. Grillová L, Bawa T, Mikalová L, Gayet-Ageron A, Nieselt K, Strouhal M, et al. Molecular characterization of *Treponema pallidum* subsp. *pallidum* in Switzerland and France with a new multilocus sequence typing scheme. Lin B (ed.) *PLOS ONE*. 2018;13(7): e0200773. doi:10.1371/journal.pone.0200773
6. Pětrošová H, Zobaníková M, Čejková D, Mikalová L, Pospíšilová P, Strouhal M, et al. Whole Genome Sequence of *Treponema pallidum* ssp. *pallidum*, Strain Mexico A, Suggests Recombination between Yaws and Syphilis Strains. Picardeau M (ed.) *PLoS Neglected Tropical Diseases*. 2012;6(9): e1832. doi:10.1371/journal.pntd.0001832
7. Štaudová B, Strouhal M, Zobaníková M, Čejková D, Fulton LL, Chen L, et al. Whole Genome Sequence of the *Treponema pallidum* subsp. *endemicum* Strain Bosnia A: The Genome Is Related to Yaws *Treponemes* but Contains Few Loci Similar to Syphilis *Treponemes*. Yang R (ed.) *PLoS Neglected Tropical Diseases*. 2014;8(11): e3261. doi:10.1371/journal.pntd.0003261
8. Harper KN, Ocampo PS, Steiner BM, George RW, Silverman MS, Bolotin S, et al. On the origin of the treponematoses: A phylogenetic approach. *PLoS Neglected Tropical Diseases*. 2008;2(1). doi:10.1371/journal.pntd.0000148
9. Mikalová L, Strouhal M, Oppelt J, Grange PA, Janier M, Benhaddou N, et al. Human *Treponema pallidum* 11q/j isolate belongs to subsp. *endemicum* but contains two loci with a sequence in TP0548 and TP0488 similar to subsp. *pertenue* and subsp. *pallidum*, respectively.

Picardeau M (ed.) *PLOS Neglected Tropical Diseases*. 2017;11(3): e0005434. doi:10.1371/journal.pntd.0005434

10. Marks M, Fookes M, Wagner J, Butcher R, Ghinai R, Sokana O, et al. Diagnostics for Yaws Eradication: Insights From Direct Next-Generation Sequencing of Cutaneous Strains of *Treponema pallidum*. *Clinical infectious diseases*. 2018;66(6): 818–824. doi:10.1093/cid/cix8
